# Supplementary material for: Tea polyphenols alleviate hydrogen peroxide-induced oxidative stress damage through the Mst/Nrf2 axis and the Keap1/Nrf2/HO-1 pathway in murine RAW264.7 cells
Source: PubMed Central journal article supplement — Exp Ther Med. 2021 Oct 22;22(6):1473. doi: 10.3892/etm.2021.10908 (PMC8561765; doi:10.3892/etm.2021.10908), 2021-10-22

Figure S1. The representative chromatograms of tea polyphenols and four standard compounds. 1. EGCG; 2. EC; 3. EGC; 4. ECG. The content of EGCG (46.8%) was the highest, followed by EGC (17.3%), EC (5.2%) and ECG (1.5%). EGCG, -epigallocatechin-3-gallate; EC, -epicatechin; EGC, -epicatechin-3-gallate; ECG, -epigallocatechin.

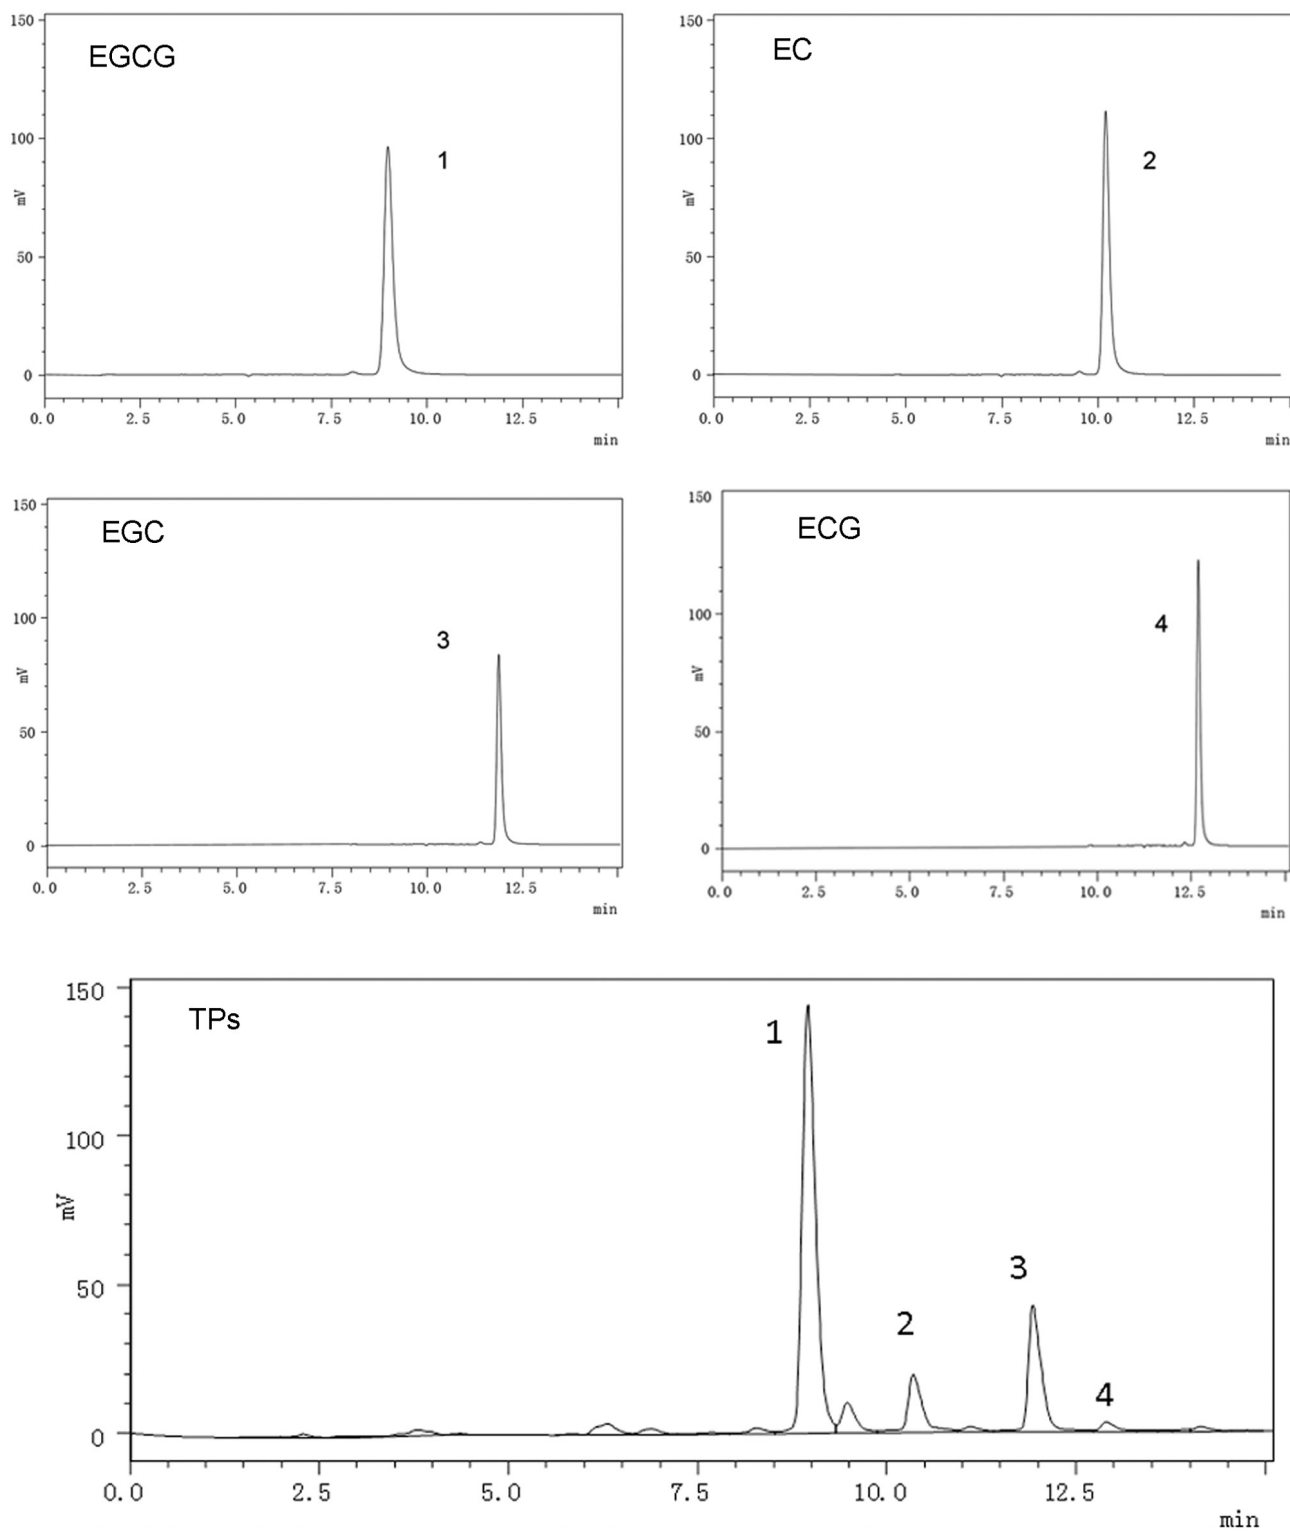

Supplement: Supplementary_Data.pdf [file Supplementary_Data.pdf]
